# Supplementary material
Source: PubMed Central journal article supplement (PMC4957522)
Supplement: NIHMS795313-supplement.pdf [file NIHMS795313-supplement.pdf]

## Supplementary Figure 1

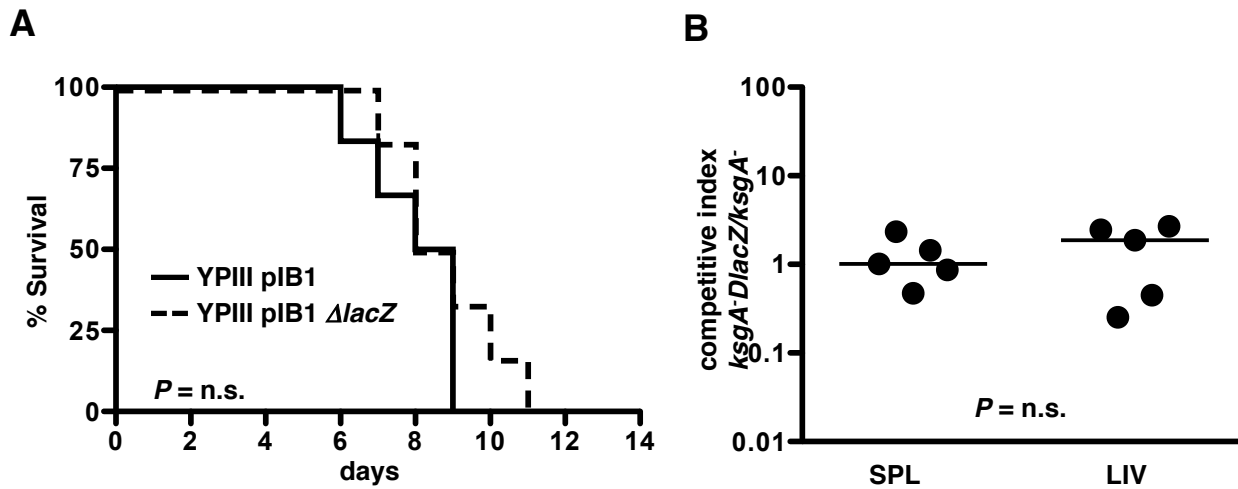

### Supplementary Figure 1. Disruption of *lacZ* does not alter *Y. pseudotuberculosis* virulence or colonization *in vivo*.

(A) Survival of mice following intravenous inoculation with 100 CFU either  $LacZ^+$  or  $DlacZ^-$  *Y. pseudotuberculosis*. (B) Competition of  $DlacZ^- ksgA^-$  and  $LacZ^+ ksgA^-$  *Y. pseudotuberculosis* strains at day 6 post-inoculation after intravenous administration of a mixture containing 100 CFU each strain. Each point indicates the C.I. [(mutant/wild-type output ratio)/(mutant/wild-type input ratio)] for the tissue sample from one mouse; bars indicate median values.
